# Supplementary material for: Construction and characterization of chimeric FcγR T cells for universal T cell therapy
Source: Research Square preprint supplement (doi:10.21203/rs.3.rs-4777567/v1), 2024-08-16
Supplement: Supplementary file 1 [file 1944388050f7ed9c48c1a174.docx]

**Fig. S4**


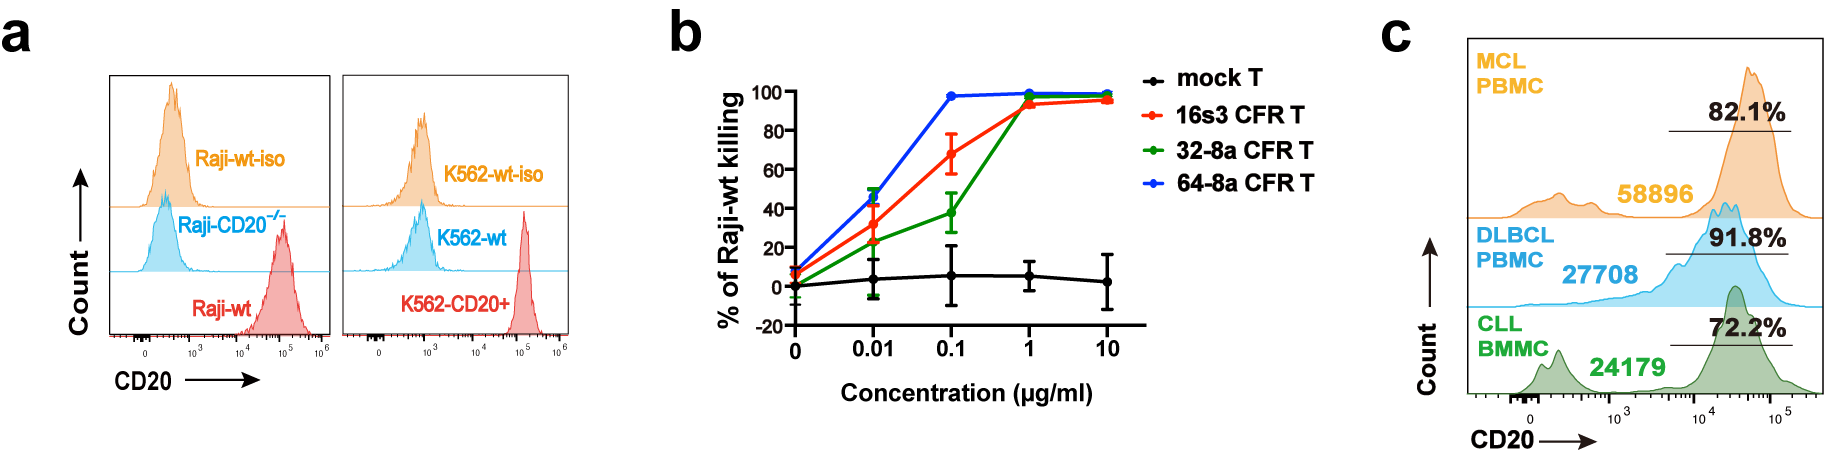


**Supplementary Figure 4.** **CD20 antigen expression, specific killing mediated by different concentrations of RTX. a** The CD20 expression of Raji-wt, Raji-CD20-/-, K562-wt and K562-CD20+ cells. **b** The Raji-wt killing by 16s3, 32-8a, 64-8a CFR T and mock T cells in the presence of RTX at different concentrations (0, 0.01, 0.1, 1, and 10 μg/ml) at 24 hours (n = 3). **c** The percentages and MFI of CD20 expression in primary cells collected from patients.
