# Supplementary material for: Construction and characterization of chimeric FcγR T cells for universal T cell therapy
Source: Research Square preprint supplement (doi:10.21203/rs.3.rs-4777567/v1), 2024-08-16
Supplement: Supplementary file 2 [file 2f7f64bc6eb5c53d48e804c1.docx]

**Fig. S5**


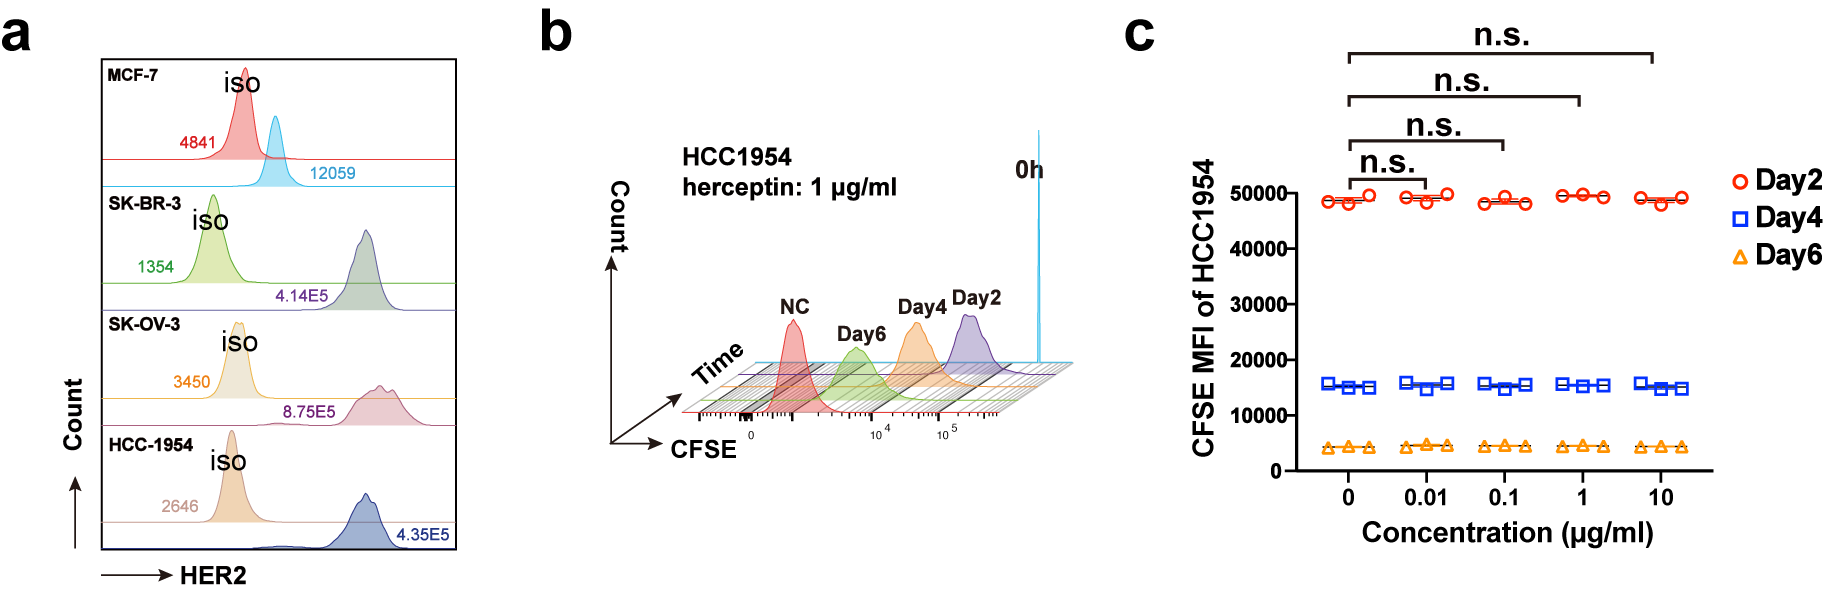


**Supplementary Figure 5.** **HER2 antigen expression and the impact of herceptin on HCC1954** **proliferation. a** The the MFI of HER2 antigen on MCF-7, SK-BR-3, SK-OV-3 and HCC1954 cell lines. **b** Thehistogram by flow cytometry illustrating theCFSE attenuation of HCC1954 cells in the presence of herceptin (1 μg/ml) on Day 2, 4, 6 following CFSE staining (Day 0). **e** The CFSE MFI attenuation of HCC1954 cells during culture in the presence of different concentrations of herceptin (0, 0.01, 0.1, 1, and 10 μg/ml) on Day 2, 4, and 6 (n = 3; n.s., no significance).
