# Supplementary material for: Construction and characterization of chimeric FcγR T cells for universal T cell therapy
Source: Research Square preprint supplement (doi:10.21203/rs.3.rs-4777567/v1), 2024-08-16
Supplement: Supplementary file 7 [file cd0a311fd7a73cdd38e3e713.docx]

**Fig. S7**


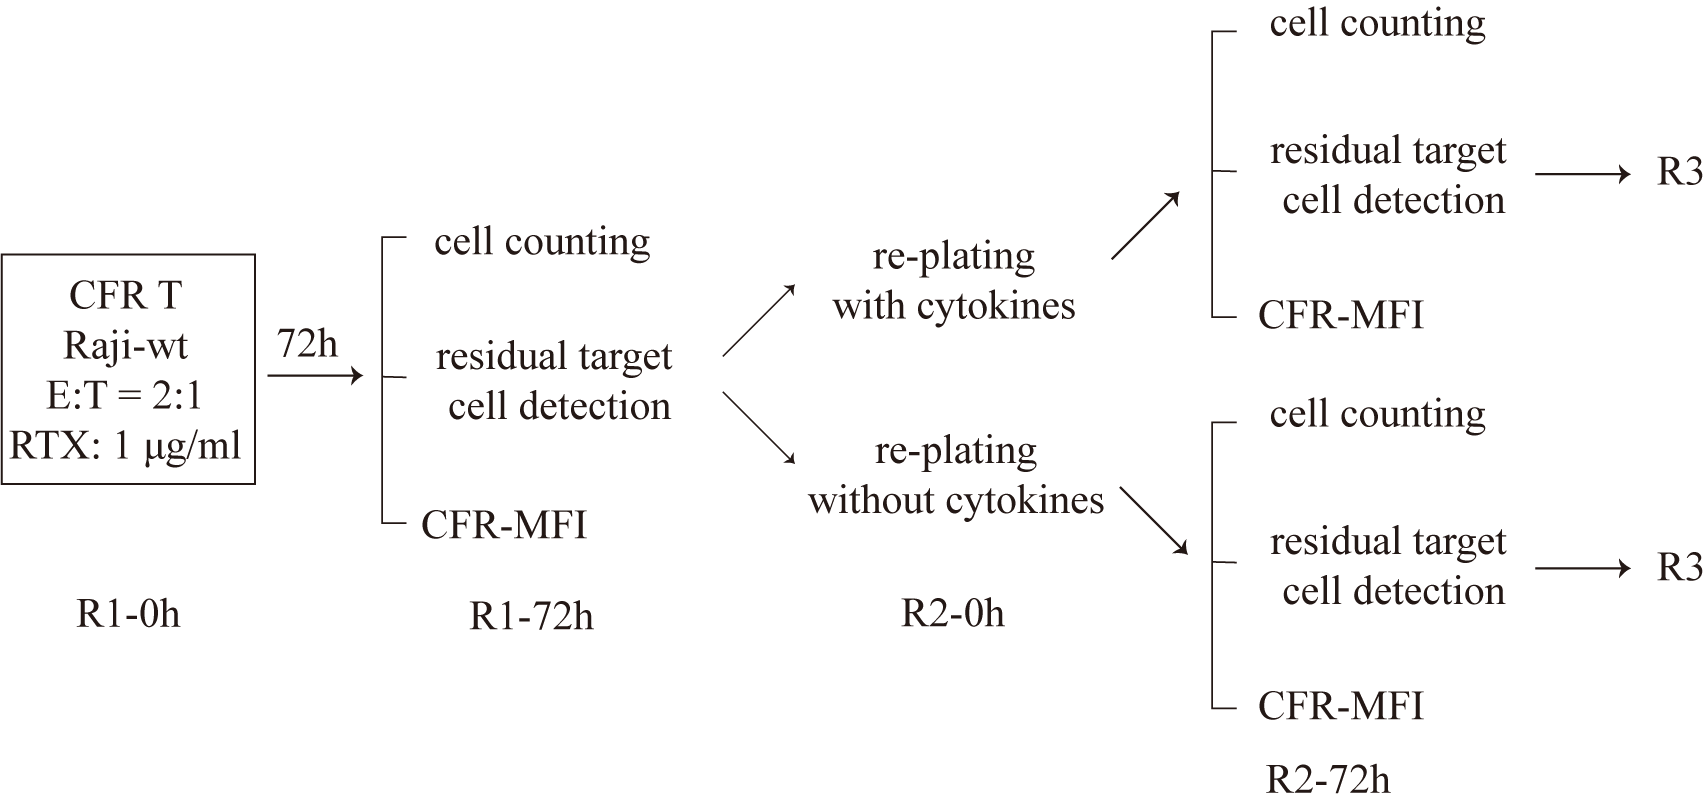


**Supplementary Figure 7.** **The schematic flow of the repetitive antigen stimulation of 16s3 and 32-8a CFR T cells by Raji-wt cells.**
